# Supplementary material for: Pd(ii) immobilized on mesoporous silica by N-heterocyclic carbene ionic liquids and catalysis for hydrogenation
Source: Royal Society of Chemistry journal article supplement (doi:10.1039/c0cp01213k), 2011-01-01
Supplement: c0cp01213k.pdf [file c0cp01213k.pdf]

## Supporting Information

### Pd(II) immobilized on mesoporous silica by N-heterocyclic carbene ionic liquids and catalysis for hydrogenation

Gang Liu, Minqiang Hou, Tianbin Wu, Tao Jiang, Honglei Fan, Guanying Yang and Buxing Han\*

Beijing National Laboratory for Molecular Sciences, Institute of Chemistry, Chinese Academy of Sciences, Beijing 100190, China. Fax: (+86) 10-62562821; e-mail: hanbx@iccas.ac.cn

Some actual NMR spectra:

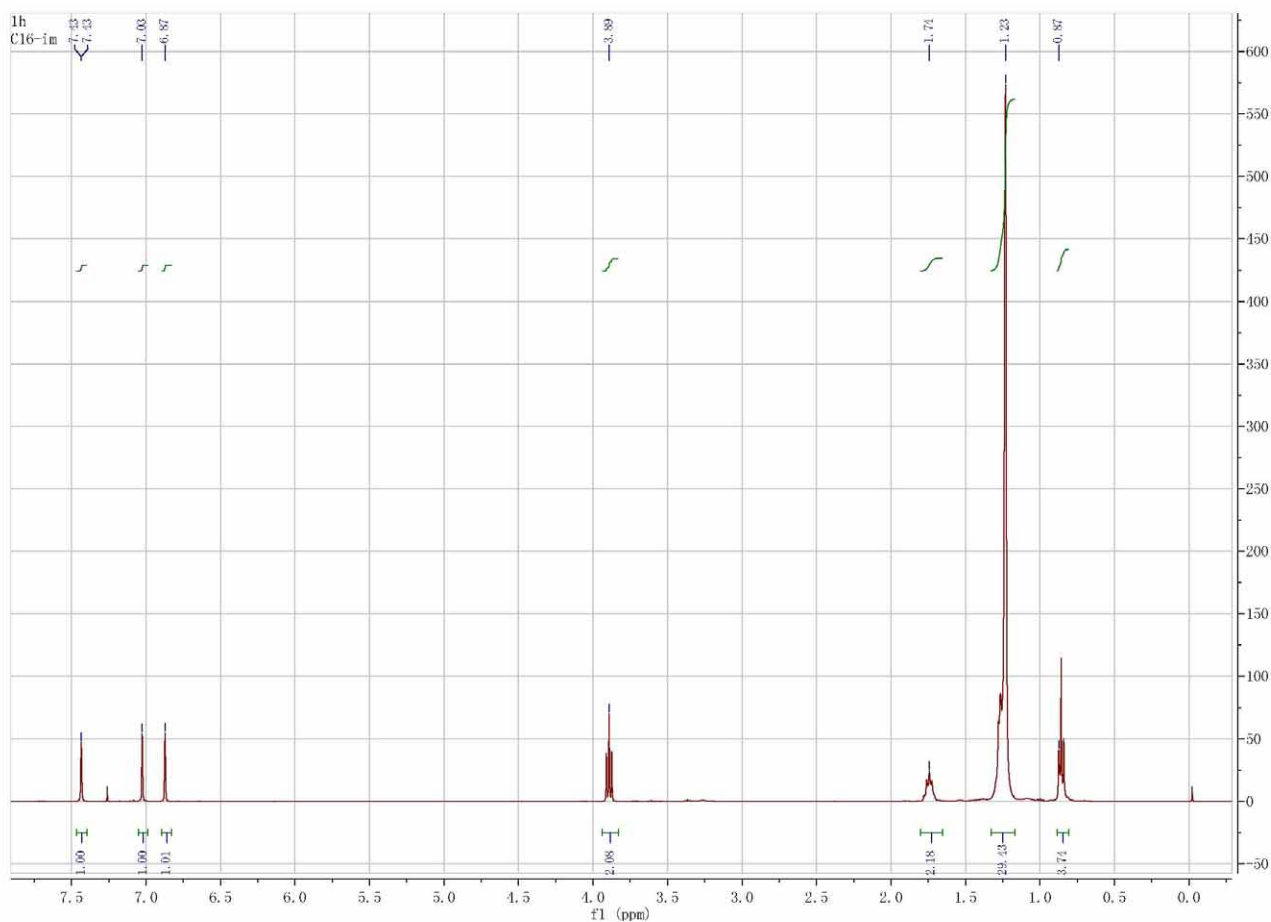

Fig. S1 NMR spectrum of N-decylimidazole

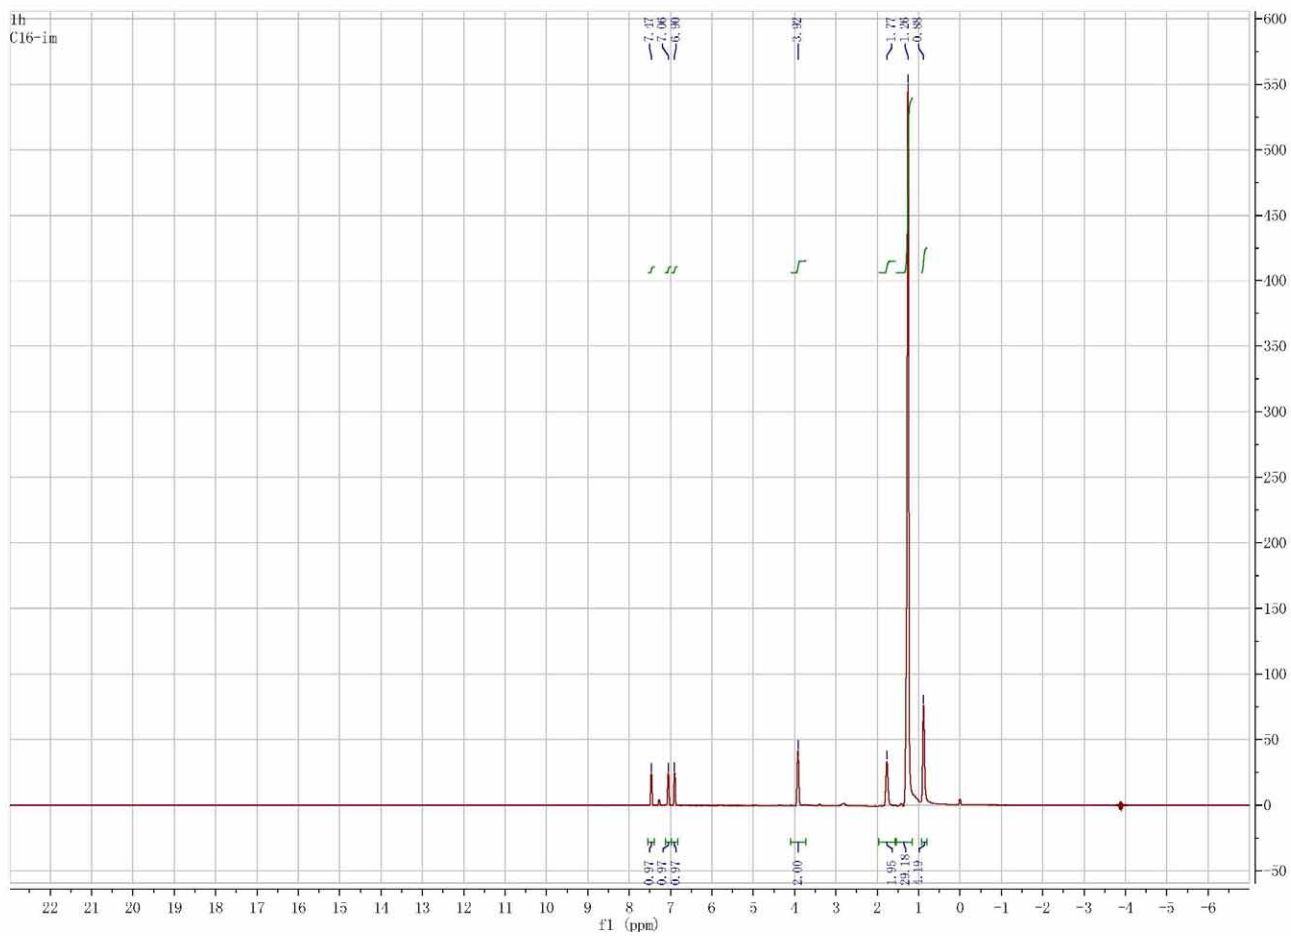

**Fig. S2** NMR spectrum of N-hexadecylimidazole

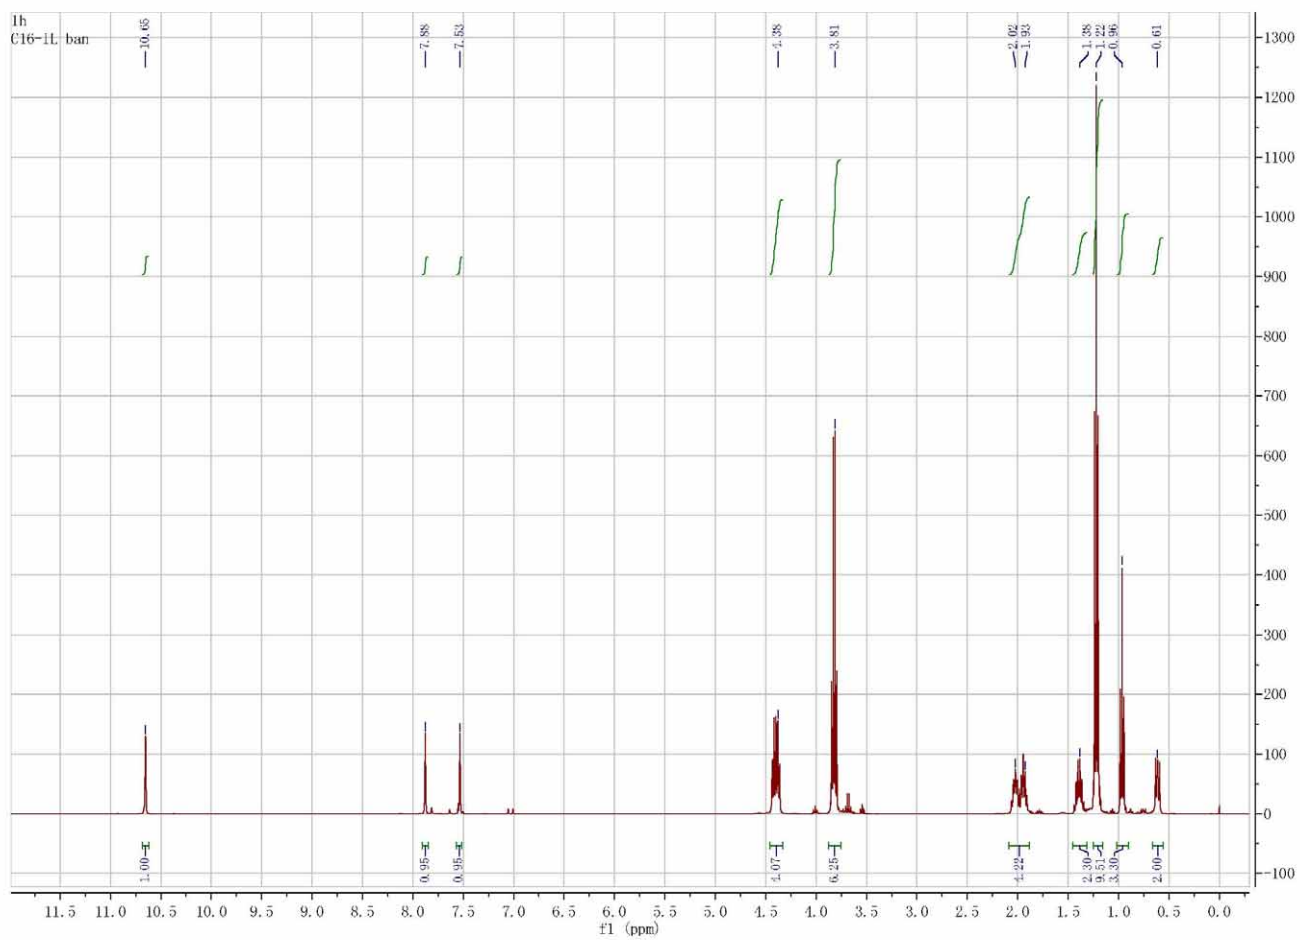

**Fig. S3** NMR spectra of IL-4
